# Supplementary material
Source: PubMed Central journal article supplement (PMC1913849)
Supplement: pnas_0608477104_1.pdf [file pnas_0608477104_1.pdf]

**Table 1. Stable isotope values of modern Adélie Penguin prey (N = 5) and eggshell**

(N = 57). The samples are from three major regions of Antarctica: the Ross Sea, East Antarctica, and the Antarctic Peninsula. Historic eggshell samples (N = 20) from Scott's hut at Cape Evans, dating from between 1911-1917, also are provided.

| Specimen                     | $\delta^{13}\text{C}_{\text{carb}}$ | $\delta^{13}\text{C}_{\text{organic}}$ | $\delta^{18}\text{O}_{\text{carb}}$ | $\delta^{15}\text{N}_{\text{organic}}$ |
|------------------------------|-------------------------------------|----------------------------------------|-------------------------------------|----------------------------------------|
| <u>Modern Prey</u>           |                                     |                                        |                                     |                                        |
| <i>Chionodraco hamatus</i>   |                                     | -24.1                                  |                                     | 14.8                                   |
| <i>Gymnodraco acuticeps</i>  |                                     | -24.1                                  |                                     | 14.9                                   |
| <i>Trematomus bernacchii</i> |                                     | -18.8                                  |                                     | 12.6                                   |
| <i>Euphausia superba</i>     |                                     | -31.4                                  |                                     | 5.2                                    |
| <i>Euphausia superba</i>     |                                     |                                        |                                     | 4.1                                    |
| <u>Ross Sea Eggshell</u>     |                                     |                                        |                                     |                                        |
| Edmonson Point-1             | -16.8                               |                                        | -7.5                                |                                        |
| Edmonson Point-2             | -19.7                               |                                        | -6.1                                | 8.6                                    |
| Edmonson Point-3             | -18.6                               |                                        | -8.0                                | 9.5                                    |
| Edmonson Point-4             | -17.9                               |                                        | -6.0                                |                                        |
| Edmonson Point-5             | -20.2                               |                                        | -6.5                                | 7.4                                    |
| Edmonson Point-6             | -17.1                               |                                        | -7.4                                |                                        |
| Edmonson Point-7             | -17.3                               |                                        | -7.2                                | 9.6                                    |
| Edmonson Point-8             | -17.6                               |                                        | -5.9                                |                                        |
| Edmonson Point-9             | -19.2                               |                                        | -5.1                                |                                        |
| Edmonson Point-10            | -18.3                               |                                        | -6.6                                | 9.1                                    |

Table 1 (continued).

| Specimen                        | $\delta^{13}\text{C}_{\text{carb}}$ | $\delta^{13}\text{C}_{\text{organic}}$ | $\delta^{18}\text{O}_{\text{carb}}$ | $\delta^{15}\text{N}_{\text{organic}}$ |
|---------------------------------|-------------------------------------|----------------------------------------|-------------------------------------|----------------------------------------|
| Cape Hallett-Beach Sample       | -19.5                               | -26.9                                  | -9.4                                |                                        |
| Cape Hallett-1                  | -20.8                               | -25.1                                  | -8.4                                | 8.7                                    |
| Cape Hallett-2                  | -20.0                               | -25.0                                  | -6.8                                | 8.5                                    |
| Cape Hallett-3                  | -19.3                               |                                        | -6.3                                |                                        |
| Cape Hallett-4                  | -20.0                               | -24.9                                  | -5.0                                | 9.1                                    |
| Cape Hallett-5                  | -20.0                               | -24.1                                  | -6.3                                | 9.7                                    |
| Cape Hallett-6                  | -19.5                               | -24.3                                  | -8.8                                |                                        |
| Cape Hallett-7                  | -20.8                               |                                        | -8.8                                |                                        |
| Cape Hallett-8                  | -20.0                               | -23.8                                  | -5.6                                |                                        |
| Cape Hallett-9                  | -19.9                               |                                        | -5.9                                |                                        |
| Cape Hallett-10                 | -19.1                               | -24.4                                  | -6.0                                | 8.6                                    |
| Inexpressible Island-1          | -18.7                               | -25.2                                  | -6.3                                | 9.5                                    |
| Inexpressible Island-2          | -18.2                               | -24.6                                  | -7.1                                | 9.3                                    |
| Inexpressible Island-3          | -19.9                               | -24.5                                  | -5.6                                | 8.9                                    |
| Inexpressible Island-4          | -18.9                               | -24.2                                  | -6.1                                | 8.9                                    |
| Inexpressible Island-5          | -20.1                               | -24.6                                  | -7.7                                | 9.5                                    |
| Inexpressible Island-6          | -18.4                               | -24.8                                  | -7.0                                | 9.1                                    |
| Inexpressible Island-7          | -18.8                               | -21.6                                  | -6.0                                | 6.8                                    |
| Inexpressible Island-8          | -19.4                               | -25.2                                  | -8.0                                | 9.3                                    |
| Inexpressible Island-9          | -20.2                               | -23.9                                  | -8.5                                | 9.6                                    |
| Inexpressible Island-10         | -17.4                               |                                        | -4.9                                |                                        |
| <u>East Antarctica Eggshell</u> |                                     |                                        |                                     |                                        |
| Shirley Island Bag 1            | -20.4                               |                                        | -6.6                                |                                        |
| Shirley Island Bag 1            | -19.0                               | -24.5                                  | -6.9                                |                                        |

Table 1 (continued).

| Specimen             | $\delta^{13}\text{C}_{\text{carb}}$ | $\delta^{13}\text{C}_{\text{organic}}$ | $\delta^{18}\text{O}_{\text{carb}}$ | $\delta^{15}\text{N}_{\text{organic}}$ |
|----------------------|-------------------------------------|----------------------------------------|-------------------------------------|----------------------------------------|
| Shirley Island Bag 1 | -18.8                               | -24.9                                  | -4.4                                | 7.0                                    |
| Shirley Island Bag 1 | -21.0                               | -25.3                                  | -5.9                                |                                        |
| Shirley Island Bag 1 | -19.0                               | -24.6                                  | -6.0                                | 5.5                                    |
| Wilkes Bag 2         | -19.7                               | -25.4                                  | -7.1                                | 7.2                                    |
| Wilkes Bag 2         | -20.1                               | -25.3                                  | -6.5                                | 7.7                                    |
| Wilkes Bag 2         | -20.5                               | -25.7                                  | -6.5                                |                                        |
| Wilkes Bag 2         | -19.5                               |                                        | -5.1                                |                                        |
| Wilkes Bag 2         | -21.0                               | -26.5                                  | -6.4                                | 6.8                                    |
| King George Island   | -20.6                               | -22.3                                  | -5.9                                |                                        |
| King George Island   | -16.9                               | -23.0                                  | -6.7                                | 9.2                                    |
| King George Island   | -19.1                               | -22.8                                  | -6.3                                | 9.1                                    |
| King George Island   | -19.7                               |                                        | -5.6                                |                                        |
| King George Island   | -19.7                               | -23.0                                  | -5.2                                | 7.9                                    |
| King George Island   | -18.5                               | -22.2                                  | -5.8                                | 8.1                                    |
| Cape Crozier         | -19.4                               | -24.6                                  | -7.6                                | 9.1                                    |
| Cape Crozier         | -20.1                               | -25.4                                  | -5.7                                | 8.8                                    |
| Cape Crozier         | -20.8                               | -27.8                                  | -5.2                                | 8.2                                    |
| Cape Crozier         | -19.9                               | -26.2                                  | -7.0                                | 7.6                                    |
| Cape Crozier         | -19.8                               | -24.9                                  | -7.6                                | 8.5                                    |
| Palmer Station       | -19.5                               | -25.3                                  | -5.9                                | 7.8                                    |
| Palmer Station       | -19.5                               | -24.9                                  | -5.4                                | 7.8                                    |
| Palmer Station       | -19.8                               | -25.8                                  | -6.2                                | 8.4                                    |
| Palmer Station       | -19.3                               | -22.6                                  | -7.1                                | 7.3                                    |
| Palmer Station       | -19.4                               | -25.6                                  | -5.7                                | 7.5                                    |

Table 1 (continued).

| Specimen                            | $\delta^{13}\text{C}_{\text{carb}}$ | $\delta^{13}\text{C}_{\text{organic}}$ | $\delta^{18}\text{O}_{\text{carb}}$ | $\delta^{15}\text{N}_{\text{organic}}$ |
|-------------------------------------|-------------------------------------|----------------------------------------|-------------------------------------|----------------------------------------|
| <u>Cape Evans Historic Eggshell</u> |                                     |                                        |                                     |                                        |
| Cape Evans-1                        | -19.2                               |                                        | -7.0                                | 9.2                                    |
| Cape Evans-2                        | -18.8                               |                                        | -6.3                                |                                        |
| Cape Evans-3                        | -19.8                               |                                        | -6.3                                |                                        |
| Cape Evans-4                        | -18.3                               |                                        | -8.7                                | 10.8                                   |
| Cape Evans-5                        | -19.1                               |                                        | -7.8                                | 11.0                                   |
| Cape Evans-6                        | -19.1                               | -25.5                                  | -7.9                                | 9.7                                    |
| Cape Evans-7                        | -17.7                               | -24.7                                  | -9.3                                | 11.2                                   |
| Cape Evans-8                        | -19.0                               |                                        | -8.2                                | 9.0                                    |
| Cape Evans-9                        | -18.3                               |                                        | -8.4                                | 11.6                                   |
| Cape Evans-10                       | -19.6                               |                                        | -7.1                                | 10.9                                   |
| Cape Evans-11                       | -18.7                               | -25.4                                  | -6.8                                | 11.1                                   |
| Cape Evans-12                       | -18.3                               |                                        | -9.1                                | 10.2                                   |
| Cape Evans-13                       | -19.5                               |                                        | -8.5                                | 10.6                                   |
| Cape Evans-14                       | -18.3                               |                                        | -8.0                                | 9.6                                    |
| Cape Evans-15                       | -18.5                               |                                        | -5.3                                | 10.1                                   |
| Cape Evans-16                       | -19.2                               |                                        | -6.9                                |                                        |
| Cape Evans-17                       | -19.3                               |                                        | -6.0                                |                                        |
| Cape Evans-18                       | -18.9                               |                                        | -7.8                                | 10.2                                   |
| Cape Evans-19                       | -19.0                               |                                        | -6.5                                | 9.9                                    |
| Cape Evans-20                       | -19.4                               | -24.6                                  | -6.5                                | 9.1                                    |
