# Supplementary material
Source: PubMed Central journal article supplement (PMC1913849)
Supplement: pnas_0608477104_2.pdf [file pnas_0608477104_2.pdf]

**Table 2. Stable isotope values on fossil eggshell from abandoned penguin colonies.** The samples are from three major regions of the Antarctic: the Ross Sea, East Antarctica, and the Antarctic Peninsula. It was not possible to extract carbon, oxygen, or nitrogen from all samples. Average age of each sample is provided in cal or  $^{14}\text{C}$  yr BP (only those  $> 26,000$   $^{14}\text{C}$  yr BP) based on radiocarbon dates of bone or other associated material from the same stratigraphic level, or estimated (indicated by an asterisk\*) based on dated material from levels above and below the sampled material. Samples split in half and dated directly are indicated by a dagger ( $\dagger$ ). All dates (lab number provided) except those from the Ross Sea are from previously published papers<sup>3-5</sup>.

| Location                     | Age  | Lab Number | $\delta^{13}\text{C}_{\text{carb}}$ | $\delta^{13}\text{C}_{\text{org}}$ | $\delta^{18}\text{O}_{\text{carb}}$ | $\delta^{15}\text{N}_{\text{org}}$ |
|------------------------------|------|------------|-------------------------------------|------------------------------------|-------------------------------------|------------------------------------|
| <u>Ross Sea</u>              |      |            |                                     |                                    |                                     |                                    |
| Adelie Cove Site 3 Level 2-1 | 515  | NZA 20747  |                                     | -25.9                              |                                     |                                    |
| Adelie Cove Site 3 Level 2-2 | 515  |            |                                     | -23.5                              |                                     | 14.0                               |
| Adelie Cove Site 3 Level 2-3 | 515  |            | -10.3                               | -27.5                              | -9.0                                | 13.5                               |
| Adelie Cove Site 3 Level 2-4 | 515  |            | -10.9                               | -27.5                              | -8.1                                | 13.8                               |
| Adelie Cove Site 3 Level 2-5 | 515  |            | -9.4                                | -25.7                              | -9.8                                | 12.7                               |
| Adelie Cove Site 3 Level 3-1 | 575* |            | -11.3                               | -27.7                              | -8.3                                | 14.8                               |
| Adelie Cove Site 3 Level 3-2 | 575  |            | -11.7                               | -27.2                              | -7.9                                | 15.5                               |
| Adelie Cove Site 3 Level 3-3 | 575  |            |                                     | -26.3                              |                                     | 11.6                               |
| Adelie Cove Site 3 Level 3-4 | 575  |            |                                     | -25.0                              |                                     | 11.4                               |
| Adelie Cove Site 3 Level 3-5 | 575  |            | -10.5                               | -26.5                              | -7.9                                | 13.7                               |
| Adelie Cove Site 3 Level 4-2 | 635  | NZA 20748  | -11.4                               |                                    | -8.3                                |                                    |
| Adelie Cove Site 3 Level 4-3 | 635  |            | -12.0                               |                                    | -8.4                                |                                    |
| Adelie Cove Site 3 Level 4-4 | 635  |            | -14.0                               |                                    | -6.9                                |                                    |

Table 2 (continued).

| Location                        | Age               | Lab Number | $\delta^{13}\text{C}_{\text{carb}}$ | $\delta^{13}\text{C}_{\text{org}}$ | $\delta^{18}\text{O}_{\text{carb}}$ | $\delta^{15}\text{N}_{\text{org}}$ |
|---------------------------------|-------------------|------------|-------------------------------------|------------------------------------|-------------------------------------|------------------------------------|
| Adelie Cove Site 3 Level 4-5    | 635               |            | -10.5                               |                                    | -8.9                                |                                    |
| N. Adelie Cove Site 1 Level 2   | 5585 <sup>†</sup> | NZA 21107  | -8.7                                | -24.5                              | -9.7                                |                                    |
| N. Adelie Cove Site 1 Level 2-1 | 5585              |            | -7.4                                | -25.8                              | -9.0                                |                                    |
| N. Adelie Cove Site 1 Level 2-2 | 5585              |            | -5.6                                | -27.7                              | -9.5                                |                                    |
| N. Adelie Cove Site 1 Level 2-3 | 5585              |            | -8.1                                | -26.1                              | -11.5                               |                                    |
| N. Adelie Cove Site 1 Level 2-4 | 5585              |            | -7.8                                | -25.9                              | -12.2                               |                                    |
| N. Adelie Cove Site 1 Level 2-5 | 5585              |            | -9.6                                |                                    | -9.7                                |                                    |
| N. Adelie Cove Site 1 Level 3   | 5310 <sup>†</sup> | NZA 21108  | -8.0                                | -25.8                              | -10.8                               |                                    |
| N. Adelie Cove Site 1 Level 3-1 | 5310              |            | -8.3                                |                                    | -12.7                               |                                    |
| N. Adelie Cove Site 1 Level 3-3 | 5310              |            | -10.8                               |                                    | -11.7                               |                                    |
| N. Adelie Cove Site 1 Level 3-4 | 5310              |            | -10.3                               |                                    | -13.1                               |                                    |
| N. Adelie Cove Site 1 Level 3-5 | 5310              |            | -8.2                                |                                    | -10.2                               |                                    |
| N. Adelie Cove Site 1 Level 4-1 | 6880              | NZA 20729  | -7.0                                | -25.7                              | -9.5                                |                                    |
| N. Adelie Cove Site 1 Level 4-2 | 6880              |            | -7.6                                | -25.8                              | -10.5                               | 14.7                               |
| N. Adelie Cove Site 1 Level 4-3 | 6880              |            | -8.8                                | -25.3                              | -10.9                               | 13.1                               |
| N. Adelie Cove Site 1 Level 4-4 | 6880              |            | -10.9                               | -25.9                              | -11.6                               | 13.9                               |
| N. Adelie Cove Site 1 Level 4-5 | 6880              |            | -7.5                                | -26.0                              | -11.0                               | 13.5                               |
| N. Adelie Cove Site 1 Level 5-1 | 6675              | NZA 20744  | -9.1                                | -25.7                              | -12.2                               | 15.0                               |
| N. Adelie Cove Site 1 Level 5-2 | 6675              |            | -8.8                                | -26.1                              | -11.1                               | 14.8                               |
| N. Adelie Cove Site 1 Level 5-4 | 6675              |            |                                     | -25.6                              |                                     | 11.9                               |
| N. Adelie Cove Site 1 Level 5-5 | 6675              |            |                                     | -24.6                              |                                     | 13.1                               |
| N. Adelie Cove Site 1 Level 6-1 | 6785              | NZA 20745  | -9.8                                | -26.0                              | -9.4                                |                                    |
| N. Adelie Cove Site 1 Level 6-3 | 6785              |            | -9.7                                |                                    | -10.6                               |                                    |

Table 2 (continued).

| Location                        | Age               | Lab Number | $\delta^{13}\text{C}_{\text{carb}}$ | $\delta^{13}\text{C}_{\text{org}}$ | $\delta^{18}\text{O}_{\text{carb}}$ | $\delta^{15}\text{N}_{\text{org}}$ |
|---------------------------------|-------------------|------------|-------------------------------------|------------------------------------|-------------------------------------|------------------------------------|
| N. Adelie Cove Site 1 Level 6-5 | 6785              |            | -7.9                                | -25.3                              | -10.9                               |                                    |
| N. Adelie Cove Site 1 Level 7-1 | 6890              | NZA 20746  | -10.0                               | -25.9                              | -9.1                                | 12.6                               |
| N. Adelie Cove Site 1 Level 7-2 | 6890              |            | -9.6                                | -25.9                              | -9.0                                | 16.0                               |
| N. Adelie Cove Site 1 Level 7-3 | 6890              |            |                                     | -26.2                              |                                     | 14.2                               |
| N. Adelie Cove Site 1 Level 7-4 | 6890              |            | -8.6                                | -25.8                              | -10.0                               | 15.2                               |
| N. Adelie Cove Site 1 Level 7-5 | 6890              |            | -8.5                                | -26.1                              | -9.7                                | 16.3                               |
| N. Adelie Cove Site 3 Level 2-1 | 5915              | NZA 20728  | -11.8                               | -25.6                              | -9.5                                |                                    |
| N. Adelie Cove Site 3 Level 2-2 | 5915              |            | -9.3                                | -24.9                              | -8.8                                | 13.1                               |
| N. Adelie Cove Site 3 Level 2-3 | 5915              |            | -10.1                               | -25.7                              | -7.5                                | 14.6                               |
| N. Adelie Cove Site 3 Level 2-4 | 5915              |            | -8.7                                |                                    | -12.0                               |                                    |
| N. Adelie Cove Site 3 Level 2-5 | 5915              |            | -8.8                                | -25.2                              | -8.1                                | 13.7                               |
| Campo Icarus Site 2 Level 3-1   | 3150              | NZA 20743  | -8.2                                | -26.1                              | -8.2                                | 13.8                               |
| Campo Icarus Site 2 Level 3-2   | 3150              |            | -8.1                                | -26.3                              | -7.4                                |                                    |
| Campo Icarus Site 2 Level 3-3   | 3150              |            | -7.3                                | -26.1                              | -7.1                                | 15.2                               |
| Campo Icarus Site 2 Level 3-4   | 3150              |            | -7.7                                | -25.9                              | -7.9                                |                                    |
| Campo Icarus Site 2 Level 3-5   | 3150              |            | -8.5                                | -25.7                              | -7.2                                | 14.3                               |
| Campo Icarus Site 2 Level 4     | 2705 <sup>†</sup> | NZA 21106  | -7.6                                | -26.0                              | -7.5                                |                                    |
| Campo Icarus Site 2 Level 4-3   | 2705              |            | -9.5                                | -26.5                              | -8.1                                | 13.3                               |
| Campo Icarus Site 2 Level 4-4   | 2705              |            | -9.4                                |                                    | -8.8                                |                                    |
| Campo Icarus Site 2 Level 4-5   | 2705              |            | -7.3                                | -25.7                              | -7.3                                | 14.9                               |
| Campo Icarus Site 2 Level 5-1   | 3675              | NZA 20726  | -9.5                                |                                    | -9.2                                |                                    |
| Campo Icarus Site 2 Level 5-2   | 3675              |            | -9.1                                |                                    | -8.5                                |                                    |
| Campo Icarus Site 2 Level 5-3   | 3675              |            | -8.3                                |                                    | -7.7                                |                                    |

Table 2 (continued).

| Location                       | Age               | Lab Number | $\delta^{13}\text{C}_{\text{carb}}$ | $\delta^{13}\text{C}_{\text{org}}$ | $\delta^{18}\text{O}_{\text{carb}}$ | $\delta^{15}\text{N}_{\text{org}}$ |
|--------------------------------|-------------------|------------|-------------------------------------|------------------------------------|-------------------------------------|------------------------------------|
| Campo Icarus Site 2 Level 5-4  | 3675              |            | -9.8                                |                                    | -9.0                                |                                    |
| Campo Icarus Site 2 Level 5-5  | 3675              |            | -8.5                                |                                    | -7.8                                |                                    |
| Campo Icarus Site 2 Level 6    | 3385 <sup>†</sup> | NZA 21057  | -9.3                                | -25.9                              | -6.8                                |                                    |
| Campo Icarus Site 2 Level 6-1  | 3385              |            | -8.9                                |                                    | -9.3                                |                                    |
| Campo Icarus Site 2 Level 6-2  | 3385              |            | -7.8                                |                                    | -7.9                                |                                    |
| Campo Icarus Site 2 Level 6-3  | 3385              |            | -9.0                                |                                    | -7.2                                |                                    |
| Campo Icarus Site 2 Level 7 -1 | 3680              | NZA 20725  | -8.5                                |                                    | -8.8                                |                                    |
| Campo Icarus Site 2 Level 7 -2 | 3680              |            | -9.6                                |                                    | -6.9                                |                                    |
| Campo Icarus Site 2 Level 7 -3 | 3680              |            | -9.8                                |                                    | -8.9                                |                                    |
| Campo Icarus Site 2 Level 7 -4 | 3680              |            | -9.6                                | -25.3                              | -7.5                                |                                    |
| Campo Icarus Site 2 Level 7 -5 | 3680              |            | -10.3                               |                                    | -8.6                                |                                    |
| Campo Icarus Site 2 Level 8    | 5675 <sup>†</sup> | NZA 20787  | -7.9                                | -26.5                              | -9.5                                |                                    |
| Campo Icarus Site 2 Level 8-1  | 5675              |            | -9.4                                |                                    | -7.1                                |                                    |
| Campo Icarus Site 2 Level 8-2  | 5675              |            | -9.2                                |                                    | -7.4                                |                                    |
| Campo Icarus Site 2 Level 8-3  | 5675              |            | -7.7                                |                                    | -7.6                                |                                    |
| Campo Icarus Site 2 Level 8-4  | 5675              |            | -9.8                                |                                    | -9.8                                |                                    |
| Campo Icarus Site 2 Level 8-5  | 5675              |            | -10.5                               |                                    | -9.7                                |                                    |
| Campo Icarus Site 2 Level 9-1  | 5740              | NZA 21105  | -8.6                                | -26.4                              | -8.3                                |                                    |
| Campo Icarus Site 2 Level 9-2  | 5740              |            | -9.5                                | -25.9                              | -9.0                                | 14.8                               |
| Campo Icarus Site 2 Level 9-3  | 5740              |            | -10.8                               | -25.6                              | -9.4                                | 12.9                               |
| Campo Icarus Site 2 Level 9-4  | 5740              |            | -11.7                               | -26.6                              | -12.1                               |                                    |
| Campo Icarus Site 2 Level 9-5  | 5740              |            | -8.1                                | -26.2                              | -7.9                                |                                    |
| Campo Icarus Site 3 Level 4-1  | 3360              | NZA 20727  | -14.6                               | -26.4                              | -8.1                                | 15.5                               |
| Campo Icarus Site 3 Level 4-2  | 3360              |            | -11.6                               | -26.4                              | -10.4                               |                                    |

Table 2 (continued).

| Location                      | Age   | Lab Number | $\delta^{13}\text{C}_{\text{carb}}$ | $\delta^{13}\text{C}_{\text{org}}$ | $\delta^{18}\text{O}_{\text{carb}}$ | $\delta^{15}\text{N}_{\text{org}}$ |
|-------------------------------|-------|------------|-------------------------------------|------------------------------------|-------------------------------------|------------------------------------|
| Campo Icarus Site 3 Level 4-3 | 3360  |            | -10.4                               | -26.3                              | -9.4                                | 15.1                               |
| Campo Icarus Site 3 Level 4-4 | 3360  |            | -11.6                               |                                    | -7.2                                |                                    |
| Campo Icarus Site 3 Level 4-5 | 3360  |            | -10.6                               |                                    | -8.6                                |                                    |
| Cape Hickey Site 1 Level 2-1  | 3375  | NZA 20784  | -5.7                                |                                    | -8.0                                |                                    |
| Cape Hickey Site 1 Level 2-2  | 3375  | NZA 20785  | -8.5                                |                                    | -10.2                               |                                    |
| Cape Hickey Site 1 Level 2-3  | 3375  |            | -5.6                                |                                    | -10.2                               |                                    |
| Cape Hickey Site 1 Level 2-4  | 3375  |            | -6.1                                |                                    | -9.4                                |                                    |
| Cape Hickey Site 1 Level 2-5  | 3375  |            | -6.8                                |                                    | -9.0                                |                                    |
|                               |       | BETA       |                                     |                                    |                                     |                                    |
| Cape Hickey Site 2 Level 2-1  | 38230 | 204544     | -7.3                                |                                    | -9.1                                |                                    |
| Cape Hickey Site 2 Level 2-2  | 38230 |            | -11.7                               |                                    | -9.2                                |                                    |
| Cape Hickey Site 2 Level 2-3  | 38230 |            | -9.4                                |                                    | -9.5                                |                                    |
| Cape Hickey Site 2 Level 2-4  | 38230 |            | -9.6                                |                                    | -9.2                                |                                    |
| Cape Hickey Site 2 Level 2-5  | 38230 |            | -10.2                               |                                    | -9.6                                |                                    |
| Cape Hickey Site 2 Level 3-1  | 34220 | NZA 20904  | -7.9                                |                                    | -4.9                                |                                    |
| Cape Hickey Site 2 Level 3-2  | 34220 |            | -9.7                                |                                    | -9.5                                |                                    |
| Cape Hickey Site 2 Level 3-3  | 34220 |            | -10.7                               |                                    | -9.5                                |                                    |
| Cape Hickey Site 2 Level 3-4  | 34220 |            | -10.6                               |                                    | -10.0                               |                                    |
| Cape Hickey Site 2 Level 3-5  | 34220 |            | -9.3                                |                                    | -9.6                                |                                    |
|                               |       | BETA       |                                     |                                    |                                     |                                    |
| Cape Hickey Site 2 Level 4-1  | 31210 | 204545     | -8.9                                |                                    | -8.4                                |                                    |
| Cape Hickey Site 2 Level 4-2  | 31210 |            | -9.5                                |                                    | -9.2                                |                                    |
| Cape Hickey Site 2 Level 4-3  | 31210 |            | -10.9                               |                                    | -8.2                                |                                    |
| Cape Hickey Site 2 Level 4-4  | 31210 |            | -8.2                                |                                    | -10.0                               |                                    |

Table 2 (continued).

| Location                              | Age   | Lab Number | $\delta^{13}\text{C}_{\text{carb}}$ | $\delta^{13}\text{C}_{\text{org}}$ | $\delta^{18}\text{O}_{\text{carb}}$ | $\delta^{15}\text{N}_{\text{org}}$ |
|---------------------------------------|-------|------------|-------------------------------------|------------------------------------|-------------------------------------|------------------------------------|
| Cape Hickey Site 2 Level 4-5          | 31210 |            | -12.8                               |                                    | -11.9                               |                                    |
| Edmonson Point Site 2 Level 2-4       | 1320  | NZA 21177  | -12.3                               |                                    | -6.6                                |                                    |
| Edmonson Point Site 2 Level 2-5       | 1320  |            | -11.9                               |                                    | -6.1                                |                                    |
| Inexpressible Island Site 3 Level 3-1 | 1990  |            | -9.8                                |                                    | -9.5                                |                                    |
| Inexpressible Island Site 3 Level 3-2 | 1990  |            | -8.6                                | -25.4                              | -6.7                                |                                    |
| Inexpressible Island Site 3 Level 3-4 | 1990  |            | -9.0                                | -27.3                              | -10.5                               |                                    |
| Inexpressible Island Site 3 Level 4-1 | 3305  | NZA 20749  | -9.0                                |                                    | -9.6                                |                                    |
| Inexpressible Island Site 3 Level 4-2 | 3305  |            | -9.1                                |                                    | -10.2                               |                                    |
| Inexpressible Island Site 3 Level 4-3 | 3305  |            | -9.6                                |                                    | -10.2                               |                                    |
| Inexpressible Island Site 3 Level 4-4 | 3305  |            | -9.5                                |                                    | -9.2                                |                                    |
| Inexpressible Island Site 3 Level 5   | 3325* |            | -9.5                                | -26.1                              | -11.5                               |                                    |
| Inexpressible Island Site 3 Level 5-2 | 3325  |            | -10.3                               |                                    | -10.0                               |                                    |
| Inexpressible Island Site 3 Level 5-3 | 3325  |            | -10.0                               |                                    | -9.4                                |                                    |
| Inexpressible Island Site 3 Level 5-4 | 3325  |            | -10.3                               |                                    | -9.9                                |                                    |
| Inexpressible Island Site 3 Level 5-5 | 3325  |            | -9.8                                |                                    | -10.9                               |                                    |
| Inexpressible Island Site 3 Level 6-1 | 3340  | NZA 20750  | -10.4                               |                                    | -10.1                               |                                    |
| Inexpressible Island Site 3 Level 6-2 | 3340  |            | -10.8                               |                                    | -10.6                               |                                    |
| Inexpressible Island Site 3 Level 6-3 | 3340  |            | -10.6                               |                                    | -9.6                                |                                    |
| Inexpressible Island Site 3 Level 6-4 | 3340  |            | -10.5                               |                                    | -10.3                               |                                    |
| Inexpressible Island Site 3 Level 6-5 | 3340  |            | -9.1                                |                                    | -10.6                               |                                    |
| Inexpressible Island Site 3 Level 7-1 | 2840  | NZA 21156  | -9.6                                |                                    | -11.4                               |                                    |
| Inexpressible Island Site 3 Level 7-2 | 2840  |            | -11.6                               |                                    | -11.0                               |                                    |
| Inexpressible Island Site 3 Level 7-3 | 2840  |            | -8.8                                |                                    | -7.0                                |                                    |
| Inexpressible Island Site 3 Level 7-4 | 2840  |            | -10.4                               |                                    | -10.4                               |                                    |

Table 2 (continued)

| Location                              | Age               | Lab Number | $\delta^{13}\text{C}_{\text{carb}}$ | $\delta^{13}\text{C}_{\text{org}}$ | $\delta^{18}\text{O}_{\text{carb}}$ | $\delta^{15}\text{N}_{\text{org}}$ |
|---------------------------------------|-------------------|------------|-------------------------------------|------------------------------------|-------------------------------------|------------------------------------|
| Inexpressible Island Site 3 Level 7-5 | 2840              |            | -9.3                                |                                    | -10.2                               |                                    |
| Prior Island Site 1 Level 3-1         | 3450              | NZA 20958  |                                     |                                    |                                     | 12.8                               |
| Prior Island Site 1 Level 3-2         | 3450              |            | -9.6                                | -26.3                              | -9.8                                | 12.3                               |
| Prior Island Site 1 Level 3-3         | 3450              |            |                                     | -25.1                              |                                     | 13.2                               |
| Prior Island Site 1 Level 3-4         | 3450              |            |                                     | -26.1                              |                                     | 11.2                               |
| Prior Island Site 1 Level 3-5         | 3450              |            |                                     | -25.4                              |                                     | 12.5                               |
| <u>East Antarctica</u>                |                   |            |                                     |                                    |                                     |                                    |
| Casey Site 15 Level 2                 | 3155              | NZA 18075  | -11.9                               | -28.0                              | -4.6                                | 12.2                               |
| Casey Site 15 Level 2                 | 3155              |            | -12.6                               | -27.4                              | -4.3                                | 10.9                               |
| Casey Site 15 Level 6                 | 3365 <sup>†</sup> | NZA 17711  | -12.4                               |                                    | -5.2                                |                                    |
| Casey Site 15 Level 6                 | 3365              |            | -12.8                               |                                    | -5.1                                |                                    |
| Casey Site 15 Level 9                 | 8925 <sup>†</sup> | NZA 17710  | -12.4                               |                                    | -5.2                                |                                    |
| Casey Site 15 Level 9                 | 8925              |            | -9.4                                | -26.1                              | -5.1                                |                                    |
| Casey Site 17 Level 2                 | 3075              | NZA 18076  | -10.4                               | -26.6                              | -6.5                                | 11.8                               |
| Casey Site 17 Level 2                 | 3075              |            | -12.2                               | -28.0                              | -6.4                                | 13.0                               |
| Casey Site 17 Level 3                 | 3140              | NZA 18035  | -11.4                               | -26.6                              | -6.6                                | 11.0                               |
| Casey Site 17 Level 3                 | 3140              |            | -11.4                               | -26.7                              | -6.8                                | 12.2                               |
| Casey Site 17 Level 7                 | 8690 <sup>†</sup> | NZA 17712  | -10.5                               |                                    | -7.2                                |                                    |
| Casey Site 17 Level 7                 | 8690              |            | -10.6                               | -28.2                              | -7.6                                |                                    |
| Casey Site 30 Level 6                 | 8290 <sup>†</sup> | NZA 17696  | -10.6                               |                                    | -6.9                                |                                    |
| Casey Site 30 Level 9                 | 8715 <sup>†</sup> | NZA 17695  | -12.0                               | -27.73                             | -6.6                                |                                    |
| Casey Site 30 Level 10                | 8915 <sup>†</sup> | NZA 17694  | -11.0                               |                                    | -5.7                                |                                    |
| Casey Site 30 Level 10                | 8915              |            | -10.0                               |                                    | -6.9                                |                                    |
| Casey Site 35 Level 2                 | 6540              | NZA 17802  | -12.4                               | -27.4                              | -6.5                                |                                    |

Table 2 (continued).

| Location               | Age               | Lab Number | $\delta^{13}\text{C}_{\text{carb}}$ | $\delta^{18}\text{O}_{\text{carb}}$ | $\delta^{15}\text{N}_{\text{org}}$ |      |
|------------------------|-------------------|------------|-------------------------------------|-------------------------------------|------------------------------------|------|
| Casey Site 35 Level 3a | 6810*             |            | -10.0                               | -26.4                               | -7.2                               |      |
| Casey Site 35 Level 3b | 6810              |            | -11.3                               | -26.3                               | -6.7                               |      |
| Casey Site 35 Level 4  | 7080              | NZA 17699  | -10.7                               | -26.7                               | -6.2                               |      |
| Casey Site 35 Level 4  | 7080              |            | -12.4                               | -25.9                               | -7.6                               |      |
| Casey Site 35 Level 5  | 7660 <sup>†</sup> | NZA 17690  | -12.5                               |                                     | -6.5                               |      |
| Casey Site 35 Level 5  | 7660              |            | -11.8                               | -27.7                               | -6.6                               |      |
| Casey Site 35 Level 6a | 7575*             |            | -12.9                               | -26.6                               | -7.1                               |      |
| Casey Site 35 Level 6b | 7575              |            | -11.8                               | -28.3                               | -7.4                               | 13.6 |
| Casey Site 35 Level 7  | 7500 <sup>†</sup> | NZA 17692  | -12.0                               |                                     | -6.4                               |      |
| Casey Site 35 Level 7  | 7500              |            | -12.9                               | -27.8                               | -7.0                               |      |
| Casey Site 35 Level 8  | 8025 <sup>†</sup> | NZA 17691  | -11.3                               | -28.5                               | -7.6                               | 14.1 |
| Casey Site 44 Level 2  | 6855              | NZA 17805  | -11.8                               | -25.7                               | -6.3                               |      |
| Casey Site 44 Level 2  | 6855              |            | -11.4                               | -26.7                               | -5.7                               |      |
| Casey Site 44 Level 4  | 7460 <sup>†</sup> | NZA 17709  | -11.5                               | -29.5                               | -7.9                               |      |
| Casey Site 44 Level 7  | 7640 <sup>†</sup> | NZA 17708  | -12.7                               |                                     | -7.2                               |      |
| Casey Site 44 Level 7  | 7640              |            | -12.7                               | -26.9                               | -6.9                               |      |
| Casey Site 44 Level 8  | 8790              | NZA 17697  | -11.8                               |                                     | -6.7                               |      |
| Casey Site 44 Level 8  | 8790              |            | -10.7                               | -26.4                               | -6.3                               |      |
| Casey Site 61 Level 3  | 7490 <sup>†</sup> | NZA 17689  | -11.0                               |                                     | -7.6                               |      |
| Casey Site 61 Level 3  | 7490              |            | -10.7                               | -26.3                               | -5.2                               |      |
| Casey Site 61 Level 4  | 7025 <sup>†</sup> | NZA 17688  | -10.9                               |                                     | -7.5                               |      |
| Casey Site 61 Level 4  | 7025              |            | -10.3                               | -26.6                               | -5.5                               | 12.1 |
| Casey Site 61 Level 5a | 7340*             |            | -12.0                               |                                     | -5.5                               |      |



Table 2 (continued).

| Location                | Age               | Lab Number | $\delta^{13}\text{C}_{\text{carb}}$ | $\delta^{13}\text{C}_{\text{org}}$ | $\delta^{18}\text{O}_{\text{carb}}$ | $\delta^{15}\text{N}_{\text{org}}$ |
|-------------------------|-------------------|------------|-------------------------------------|------------------------------------|-------------------------------------|------------------------------------|
| Casey Site 61 Level 5b  | 7340              |            | -8.6                                | -26.7                              | -5.4                                |                                    |
| Casey Site 61 Level 6a  | 7340*             |            | -11.9                               | -26.8                              | -6.4                                | 12.6                               |
| Casey Site 61 Level 6b  | 7340              |            | -11.4                               | -27.2                              | -5.7                                |                                    |
| Casey Site 61 Level 7   | 7660 <sup>†</sup> | NZA 17687  | -11.6                               |                                    | -7.3                                |                                    |
| Casey Site 61 Level 8   | 7635 <sup>†</sup> | NZA 17686  | -13.4                               | -27.0                              | -6.0                                |                                    |
| Casey Site 61 Level 8   | 7635              |            | -11.5                               |                                    | -7.4                                |                                    |
| Casey Site 66 Level 4   | 2060              | NZA 18037  | -7.0                                | -27.0                              | -7.8                                |                                    |
| Casey Site 66 Level 4   | 2060              |            | -9.1                                | -25.3                              | -5.6                                |                                    |
| Casey Site 66 Level 5   | 2095              | NZA 18078  | -11.6                               | -27.8                              | -7.4                                |                                    |
| Casey Site 66 Level 5   | 2095              |            | -9.5                                | -27.3                              | -7.6                                |                                    |
| Casey Site 69 Level 4   | 5555              |            | -11.3                               | -27.8                              | -6.5                                |                                    |
| Casey Site 69 Level 5   | 7235              | NZA 17804  | -12.2                               |                                    | -6.6                                |                                    |
| Casey Site 75 Level 5   | 5890              | NZA 17803  | -10.5                               | -25.6                              | -6.6                                |                                    |
| Casey Site 78 Level 1   | 4385              | NZA 17682  | -11.3                               | -27.7                              | -4.7                                | 11.6                               |
| Casey Site 78 Level 3   | 4440              | NZA 17683  | -12.1                               | -27.6                              | -4.6                                |                                    |
| Casey Site 78 Level 5   | 4435              | NZA 17698  | -11.4                               | -27.1                              | -5.0                                |                                    |
| Casey Site 78 Level 6   | 5460              | NZA 17684  | -11.7                               |                                    | -5.8                                |                                    |
| Casey Site 80 Level 2   | 4060              | NZA 18036  | -12.1                               | -27.0                              | -6.0                                |                                    |
| Casey Site 80 Level 3   | 3850              | NZA 18077  | -12.9                               | -27.1                              | -5.0                                |                                    |
| Casey Site 80 Level 3   | 3850              |            | -12.2                               | -27.4                              | -6.6                                |                                    |
| Casey Site 80 Level 4   | 4405 <sup>†</sup> | NZA 17713  | -12.3                               |                                    | -7.2                                |                                    |
| Casey Site 80 Level 4   | 4405              |            | -13.9                               | -27.2                              | -6.1                                |                                    |
| Peterson Site 1 Level 4 | 265               | NZA 18038  | -11.5                               |                                    | -5.4                                | -26.3                              |
| Peterson Site 3 Level 8 | 1315              | NZA 18080  | -11.4                               |                                    | -7.7                                | -28.0                              |

Table 2 (continued).

| Location                            | Age  | Lab Number | $\delta^{13}\text{C}_{\text{carb}}$ | $\delta^{13}\text{C}_{\text{org}}$ | $\delta^{18}\text{O}_{\text{carb}}$ | $\delta^{15}\text{N}_{\text{org}}$ |
|-------------------------------------|------|------------|-------------------------------------|------------------------------------|-------------------------------------|------------------------------------|
| <u>Antarctic Peninsula</u>          |      |            |                                     |                                    |                                     |                                    |
| King George Island Site 2 Level 3-1 | 410  | NZA 15290  | -13.2                               |                                    | -4.3                                |                                    |
| King George Island Site 2 Level 3-2 | 410  |            | -13.2                               |                                    | -3.5                                |                                    |
| King George Island Site 2 Level 3-3 | 410  |            | -12.6                               |                                    | -2.7                                |                                    |
| King George Island Site 2 Level 3-4 | 410  |            | -12.6                               |                                    | -3.6                                |                                    |
| King George Island Site 2 Level 3-5 | 410  |            | -12.9                               |                                    | -1.7                                |                                    |
| King George Island Site 3 Level 3-1 | 385  | NZA 15295  | -12.1                               |                                    | -3.2                                |                                    |
| King George Island Site 3 Level 3-2 | 385  |            | -14.8                               |                                    | -4.0                                |                                    |
| King George Island Site 3 Level 3-3 | 385  |            | -12.6                               |                                    | -3.4                                |                                    |
| King George Island Site 3 Level 3-4 | 385  |            | -12.2                               |                                    | -3.2                                |                                    |
| King George Island Site 3 Level 3-5 | 385  |            | -12.7                               |                                    | -4.9                                |                                    |
|                                     |      | BETA       |                                     |                                    |                                     |                                    |
| Lagoon Island Site 2 Level 2-1      | 770  | 141907     | -10.0                               |                                    | -6.9                                |                                    |
| Lagoon Island Site 2 Level 2-2      | 770  |            | -10.0                               |                                    | -5.4                                |                                    |
| Lagoon Island Site 2 Level 2-3      | 770  |            | -8.7                                |                                    | -5.9                                |                                    |
| Lagoon Island Site 2 Level 2-4      | 770  |            | -10.2                               |                                    | -7.2                                |                                    |
| Lagoon Island Site 2 Level 2-5      | 770  |            | -9.1                                |                                    | -6.2                                |                                    |
|                                     |      | BETA       |                                     |                                    |                                     |                                    |
| Lagoon Island Site 2 Level 4-1      | 3615 | 141909     | -9.3                                |                                    | -4.2                                |                                    |
| Lagoon Island Site 2 Level 4-3      | 3615 |            | -9.0                                |                                    | -5.9                                |                                    |
| Lagoon Island Site 2 Level 4-4      | 3615 |            | -9.9                                |                                    | -6.1                                |                                    |
|                                     |      | BETA       |                                     |                                    |                                     |                                    |
| Lagoon Island Site 3 Level 5-1      | 5745 | 141916     | -10.2                               |                                    | -3.8                                |                                    |

Table 2 (continued).

| Location                       | Age  | Lab Number | $\delta^{13}\text{C}_{\text{carb}}$ | $\delta^{13}\text{C}_{\text{org}}$ | $\delta^{18}\text{O}_{\text{carb}}$ | $\delta^{15}\text{N}_{\text{org}}$ |
|--------------------------------|------|------------|-------------------------------------|------------------------------------|-------------------------------------|------------------------------------|
| Lagoon Island Site 3 Level 5-2 | 5745 |            | -8.8                                |                                    | -4.8                                |                                    |
| Lagoon Island Site 3 Level 5-3 | 5745 |            | -9.4                                |                                    | -5.7                                |                                    |
| Lagoon Island Site 3 Level 5-5 | 5745 |            | -10.0                               |                                    | -6.1                                |                                    |
| BETA                           |      |            |                                     |                                    |                                     |                                    |
| Ginger Island TP1 Level 4-1    | 510  | 141905     | -16.0                               |                                    | -6.8                                |                                    |
| Ginger Island TP1 Level 4-2    | 510  |            | -13.8                               |                                    | -5.3                                |                                    |
| Ginger Island TP1 Level 4-3    | 510  |            | -11.5                               |                                    | -4.7                                |                                    |
| Ginger Island TP1 Level 4-4    | 510  |            | -17.4                               |                                    | -5.7                                |                                    |
| Ginger Island TP1 Level 4-5    | 510  |            | -11.8                               |                                    | -4.4                                |                                    |
